# Supplementary material
Source: PubMed Central journal article supplement (PMC4621316)
Supplement: EC.00084-15_zek999094487so1.pdf [file EC.00084-15_zek999094487so1.pdf]

**TABLE S1** List of primers used in this study

| <b>Primer</b> | <b>Sequence 5' to 3'</b>                                   | <b>Description</b>                                                                                           | <b>PCR<sup>a</sup></b>     |
|---------------|------------------------------------------------------------|--------------------------------------------------------------------------------------------------------------|----------------------------|
| primer-1      | GCGTCGATGCAGATTCTTA<br>CTTA                                | flanking region upstream of<br><i>sol4</i> FP <sup>b</sup>                                                   | 838                        |
| primer-2      | TTGACCTCCACTAGCTCCA<br>GCCAAGCCCATCGTGTGT<br>ACTCATGTGGTT  | flanking region upstream of<br><i>sol4</i> RP <sup>c</sup> with overhang<br>sequence of 5' end of <i>hph</i> |                            |
| primer-3      | GCAAAGGAATAGAGTAGA<br>TGCCGACCGTTAGGCGAT<br>GGAGTAGAGAGAAG | flanking region downstream<br>of <i>sol4</i> RP with overhang<br>sequence of 3' end of <i>hph</i>            | 1,094                      |
| primer-4      | CATCCAAGCGAGCGAGAA<br>TGGAG                                | flanking region downstream<br>of <i>sol4</i> FP                                                              |                            |
| HYG-F         | GGCTTGGCTGGAGCTAGT<br>GGAG                                 | FP to amplify <i>hph</i> from<br>pDWJ5                                                                       | 1,372                      |
| HYG-R         | CGGTCGGCATCTACTCTAT<br>TCCTT                               | RP to amplify <i>hph</i> from<br>pDWJ5                                                                       |                            |
| primer-7      | AGAGTAAGCGGAGCGGAT<br>CAAAG                                | flanking region upstream of<br><i>sol4</i> FP nested primer                                                  |                            |
| primer-8      | CCAGAAGTGGACCTCTGA<br>TGCGA                                | flanking region downstream<br>of <i>sol4</i> RP nested primer                                                |                            |
| YG-F          | CGATGTAGGAGGGCGTGG<br>ATATGTCC                             | FP coding region of <i>hph</i> for<br>overlapping extension, pair<br>with primer-8                           |                            |
| HY-R          | GTATTGACCGATTCTTGC<br>GGTCCGAA                             | RP coding region of <i>hph</i> for<br>overlapping extension, pair<br>with primer-7                           |                            |
| primer-11     | GTGTGTCCACCTGCCTATG<br>TATC                                | FP upstream of <i>sol4</i> ,<br>verification primer                                                          | 1,950<br>(in wild type)    |
| primer-12     | CACGCTTCTTCCCGTGCAT<br>CTG                                 | RP downstream of <i>sol4</i> ,<br>verification primer                                                        | 1,581<br>(in <i>sol4</i> ) |
| Sol4BamH5     | GGATCCATGATGCCGTCCA<br>CCCTCATC                            | FP at ATG with <i>Bam</i> HI cut<br>site for 4OE construction                                                | 2,029                      |
| Sol4Hind3     | AAGCTTTCGCAAGGTCTG<br>GGAAATTC                             | RP at +276 bp from stop<br>codon with <i>Hind</i> III cut site<br>for 4OE construction                       |                            |

<sup>a</sup> PCR = PCR product length in basepair; <sup>b</sup> FP = forward primer; <sup>c</sup> RP = reverse primer

**TABLE S1** Continued

| <b>Primer</b> | <b>Sequence 5' to 3'</b>   | <b>Description</b>                                                                                    | <b>PCR<sup>a</sup></b>                                |
|---------------|----------------------------|-------------------------------------------------------------------------------------------------------|-------------------------------------------------------|
| Sol4OE5       | GTTGTGTGTCCACCTGCCT<br>ATG | FP at +92 bp from ATG for<br>confirmation of 4OE strains                                              | 2,187 (with<br>Sol4OE5 and<br>Sol4OE3<br>primer pair) |
| Sol4OE3       | CGGGAAGCTGCGAGAAGA<br>TAAG | 4OE RP at +354 bp from stop<br>codon for confirmation of<br>4OE strains                               |                                                       |
| DW38          | AGATGGTCAACGCTGCTT<br>AC   | <i>pelA</i> promoter primer for<br>confirmation of 4OE strains,<br>141 bp away from <i>PvuII</i> site | ≈ 2,200 (with<br>DW38 and<br>Sol4OE3<br>primer pair)  |
| Sol1RT-F      | TTGGTATTGGTTCGCTCGA<br>GGT | RT-PCR for <i>sol1</i>                                                                                | 530<br>(615,<br>for gDNA or<br>pre-mRNA)              |
| Sol1RT-R      | TCAACAGCGGTTGACATC<br>CTCT |                                                                                                       |                                                       |
| Sol2RT-F      | CACATCTCCATGGCTTTGG<br>CTC | RT-PCR for <i>sol2</i>                                                                                | 390<br>(470,<br>for gDNA or<br>pre-mRNA)              |
| Sol2RT-R      | GTTCGCTGCTTAGCACCC<br>AGAA |                                                                                                       |                                                       |
| Sol3RT-F      | GTTCGCCTTGATGGCAAG<br>ACTG | RT-PCR for <i>sol3</i>                                                                                | 572<br>(622,<br>for gDNA or<br>pre-mRNA)              |
| Sol3RT-R      | CGCGCATCCAGAGGATGT<br>TCAA |                                                                                                       |                                                       |
| Sol4RT-F      | TGGATCAACCAGATCGTC<br>CATC | RT-PCR for <i>sol4</i>                                                                                | 522<br>(588,<br>for gDNA or<br>pre-mRNA)              |
| Sol4RT-R      | CTTACGGTGCAGTACGCAT<br>CTA |                                                                                                       |                                                       |
| Sol5RT-F      | AGAACCCAGCGTGCATCT<br>ATAC | RT-PCR for <i>sol5</i>                                                                                | 534<br>(631,<br>for gDNA or<br>pre-mRNA)              |
| Sol5RT-R      | GATCATGGAACCTCCCAT<br>ATC  |                                                                                                       |                                                       |
| Sol6RT-F      | GCAAAGTGCTAACACCCG<br>CTCT | RT-PCR for <i>sol6</i>                                                                                | 540<br>(606,<br>for gDNA or<br>pre-mRNA)              |
| Sol6RT-R      | CGTTTAGCTGTTCTAGGCT<br>TGG |                                                                                                       |                                                       |

<sup>a</sup> PCR = PCR product length in basepair.

**TABLE S1** Continued

| <b>Primer</b> | <b>Sequence 5' to 3'</b>     | <b>Description</b>               | <b>PCR<sup>a</sup></b>                   |
|---------------|------------------------------|----------------------------------|------------------------------------------|
| Actin1RT-F    | CAATGGTTCGGGTATGTGC<br>AAG   | RT-PCR for <i>Actin1</i>         | 482<br>(633,<br>for gDNA or<br>pre-mRNA) |
| Actin1RT-R    | GAAGAGCGAAACCCTCGT<br>AGAT   |                                  |                                          |
| Sol1realt-F   | GTTGGCATGGGCTGTAGAT<br>G     | Real-time RT-PCR for <i>sol1</i> | 129                                      |
| Sol1realt-R   | ATGGTGGAAATCCCTTGCG<br>AG    |                                  |                                          |
| Sol2realt-F   | CACTACATGCTCGATGAAT<br>GC    | Real-time RT-PCR for <i>sol2</i> | 123                                      |
| Sol2realt-R   | GAACATTGGCACACCGAA<br>G      |                                  |                                          |
| Sol3realt-F   | CGTTCAGGTTAATCACCTG<br>G     | Real-time RT-PCR for <i>sol3</i> | 126                                      |
| Sol3realt-R   | CAGAAGTGGACCTCTGAT<br>G      |                                  |                                          |
| Sol4realt-F   | CAACCTTCGCCTTGCAAA<br>AG     | Real-time RT-PCR for <i>sol4</i> | 140                                      |
| Sol4realt-R   | GAAGTACTCTCTCGGTGA<br>AC     |                                  |                                          |
| Sol5realt-F   | CGCGAACAATTTTGGCATT<br>G     | Real-time RT-PCR for <i>sol5</i> | 162                                      |
| Sol5realt-R   | ATGGCAGACTTCTTGTC<br>CA<br>G |                                  |                                          |
| Sol6realt-F   | CAAGCAATACGGACCGGT<br>G      | Real-time RT-PCR for <i>sol6</i> | 135                                      |
| Sol6realt-R   | GGAAACGAGATGCATCGA<br>TAG    |                                  |                                          |
| ORF2realt-F   | ATTGGACCCGCACCAAAT<br>AC     | Real-time RT-PCR for ORF2        | 140                                      |
| ORF2realt-R   | GTCTTCATGGGATCTCCAA<br>GG    |                                  |                                          |

<sup>a</sup> PCR = PCR product length in basepair.

**TABLE S1** Continued

| <b>Primer</b>  | <b>Sequence 5' to 3'</b>    | <b>Description</b>                   | <b>PCR<sup>a</sup></b> |
|----------------|-----------------------------|--------------------------------------|------------------------|
| ORF3real-F     | CCGCTCTAGCGATAAGAA<br>GG    | Real-time RT-PCR for ORF3            | 136                    |
| ORF3real-R     | CGTAGCAACCTGATGCAA<br>C     |                                      |                        |
| ORF10real-F    | CACTGCCATCCTTGAGAC<br>AG    | Real-time RT-PCR for<br>ORF10        | 127                    |
| ORF10real-R    | GAGACTTCGCTGTTCTTGC<br>C    |                                      |                        |
| Pseudo6 real-F | GCACTTTGACAGGCATAC<br>AAAG  | Real-time RT-PCR for<br>pseudogene 6 | 144                    |
| Pseudo6 real-R | GAGTGTGGAGGCATGCAT<br>AG    |                                      |                        |
| PKS1real-F     | CAACATGTCTCCACGTGA<br>AG    | Real-time RT-PCR for PKS1            | 130                    |
| PKS1real-R     | AATGCGGTTTCAGCTTTGTG<br>G   |                                      |                        |
| PKS2real-F     | GAACCTTGCTGGTGCATC<br>G     | Real-time RT-PCR for PKS2            | 123                    |
| PKS2real-R     | GCTTTGGACAGCGACTTG<br>AG    |                                      |                        |
| Actin1real-F   | GTATCATGATCGGTATGGG<br>ACAG | Real-time RT-PCR for <i>Actin1</i>   | 134                    |
| Actin1real-R   | CCAGATCTTCTCCATGTCG<br>TCC  |                                      |                        |

<sup>a</sup> PCR = PCR product length in basepair.

**TABLE S2** The locations of putative binding motifs for a Zn(II)<sub>2</sub>Cys<sub>6</sub> zinc cluster transcription factor in the promoter regions of biosynthetic genes for solanapyrone production

| Gene <sup>a</sup> | Binding site I <sup>b</sup>                            | Binding site II <sup>c</sup>            |
|-------------------|--------------------------------------------------------|-----------------------------------------|
| AR <i>sol1</i>    | 285 <sup>d</sup> , [G <b>CA</b> (N <sub>10</sub> )GGC] | None                                    |
| AR <i>sol2</i>    | 320, [ <b>ACC</b> (N <sub>10</sub> )GGC]               | 321, [CCG(N <sub>8</sub> )CGG]          |
| AR <i>sol3</i>    | 252, [GCC(N <sub>10</sub> )GGC]                        | 253, [CCG(N <sub>8</sub> )CGG]          |
| AR <i>sol5</i>    | 355, [GCC(N <sub>10</sub> )GGC]                        | 356, [CCG(N <sub>8</sub> )CGG]          |
| AR <i>sol6</i>    | 224, [GCC(N <sub>10</sub> )GGC]                        | 225, [CCG(N <sub>8</sub> )CGG]          |
| AS <i>sol1</i>    | 438, [G <b>AC</b> (N <sub>10</sub> )GGC]               | 439, [ <b>ACG</b> (N <sub>8</sub> )CGG] |
| AS <i>sol2</i>    | 320, [ <b>ACC</b> (N <sub>10</sub> )GGC]               | 321, [CCG(N <sub>8</sub> )CGG]          |
| AS <i>sol3</i>    | 259, [GCC(N <sub>10</sub> )GGC]                        | 260, [CCG(N <sub>8</sub> )CGG]          |
| AS <i>sol5</i>    | 357, [GCC(N <sub>10</sub> )GGC]                        | 358, [CCG(N <sub>8</sub> )CGG]          |
| AS <i>sol6</i>    | 310, [GCC(N <sub>10</sub> )GGC]                        | 311, [CCG(N <sub>8</sub> )CGG]          |

<sup>a</sup> AR and AS prefixes indicate *Ascochyta rabiei* and *Alternaria solani*, respectively.

<sup>b</sup> Perfect sites contain the 5'-GCC(N<sub>10</sub>)GGC-3' consensus motif. Imperfect sites contain a single base pair mismatch in one of the two triplet half sites (GCC or GGC), highlighted in bold.

<sup>c</sup> Perfect sites contain the 5'-CCG(N<sub>8</sub>)CGG-3' consensus motif. Imperfect sites contain a single base pair mismatch in one of the two triplet half sites (CCG or CGG), highlighted in bold.

<sup>d</sup> The sites represent those found within 500 bp upstream of the ATG start codon. The numbers indicate relative position of the binding site from ATG start codon.

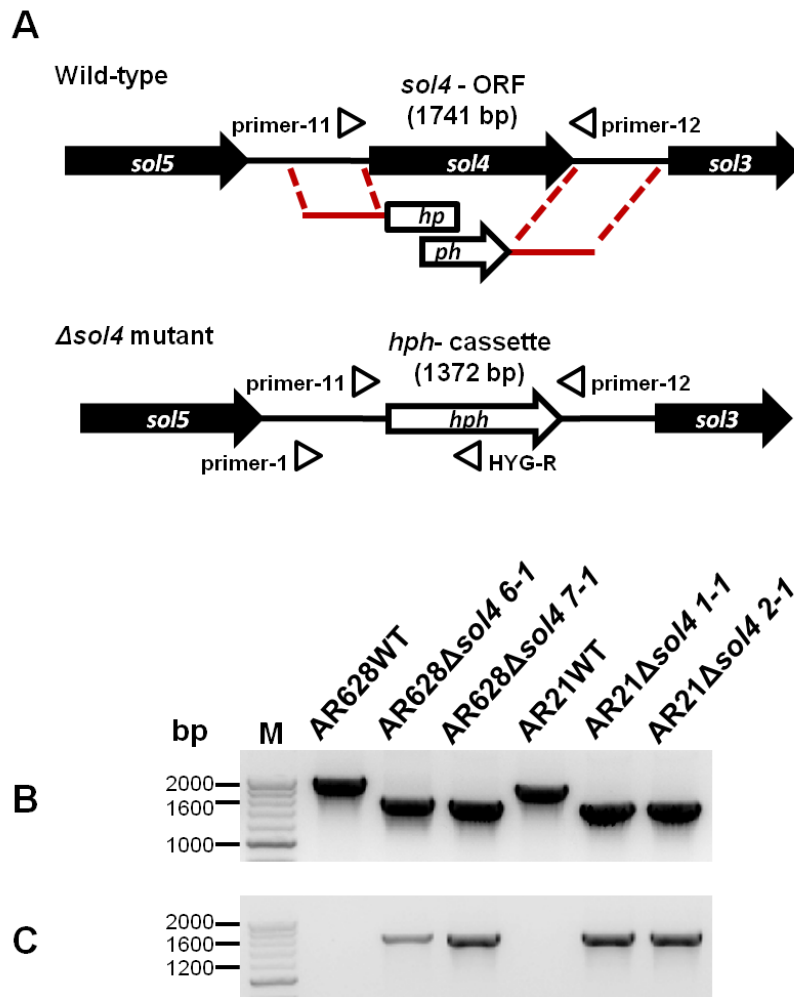

**FIG S1** Gene replacement via split-marker strategy and PCR analysis of *sol4*-deletion. (A)

Schematic diagram of targeted gene replacement strategy. (B) PCR analysis of *A. rabiei* wild-type isolates and their  $\Delta$ *sol4* mutants. Replacement of the *sol4* gene by the *hph* cassette was verified in two independent mutants from each isolate using a primer pair, primer-11 and primer-12 (wild-types, 1,950 bp;  $\Delta$ *sol4* mutants, 1,581 bp). (C) PCR verification for homologous integration of the replacement fragment to the correct genomic site with a primer pair, primer-1 and HY-R (1,604 bp).

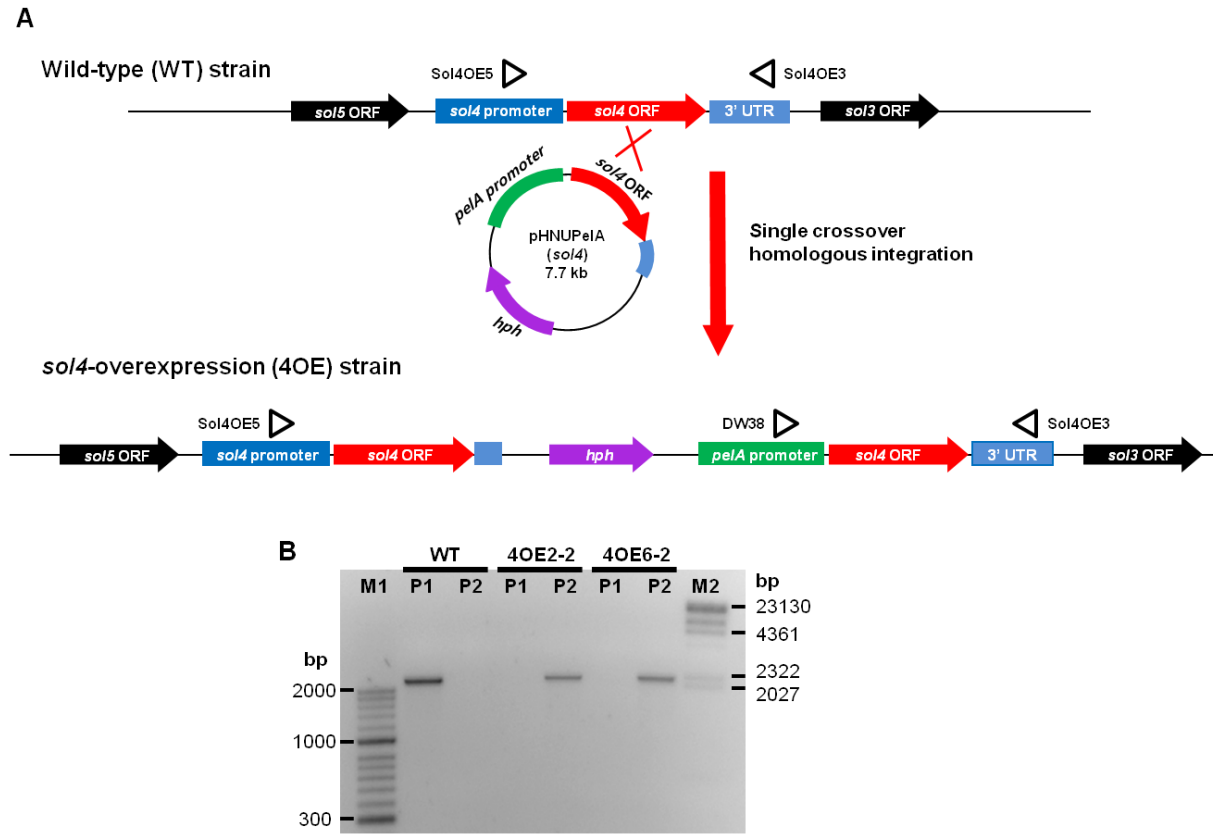

**FIG S2** Verification of integration of pHNUPelA plasmid carrying *sol4* open reading frame in *sol4*-overexpression (4OE) strains. (A) Strategy to overexpress the *sol4* gene and positioning of the primers used for a diagnostic PCR. (B) PCR analysis of AR628 wild-type (WT) strain and two independent 4OE strains confirmed a single crossover event at the *sol4* genomic locus in 4OE strains, using two primer pairs, Sol4OE5 and Sol4OE3 (P1) and DW38 and Sol4OE3 (P2). M1 = 100 bp DNA ladder, M2 =  $\lambda$  DNA digested with *HindIII*.





**FIG S3** Multiple DNA sequence alignment of *Molly* transposon from *Stagonospora nodorum* and degenerated transposons (pseudogene 4–6) located proximal to the solanapyrone gene cluster in *A. rabiei*. Identical nucleotides are shaded in black. The regions marked with purple line indicate terminal inverted repeat. The coding regions of putative transposase are indicated by arrows. The first RIP mutation (CpA to TpA) which introduced premature stop codon in the transposase domain of pseudogene 4, 5, or 6 are indicated by red boxes in comparison to the functional *Molly* transposon. Note that the four elements are of nearly identical length and include 5' and 3' TA insertion sites.



**FIG S4** Pairwise sequence alignment of *ORF10* and a *P450* homologous gene found in *Coniosporium apollinis*. (A) Pairwise comparison of deduced amino acid sequence of *ORF10* and the homologous *P450* gene from *Coniosporium apollinis* (GenBank accession: XP\_007784573). Only a region conserved with *ORF10* (240 out of 535 residues) was shown for the *P450*. Alignment shaded to indicate similarity with black corresponding to blocks of identical residues, and with grey corresponding to conservative substitutions. Pairwise DNA sequence comparison between upstream of *ORF10* and the corresponding region of the hypothetical protein (B), between the coding region of *ORF10* and the corresponding region of the hypothetical protein (C) and between downstream of *ORF10* and the corresponding region of the hypothetical protein (D). Note that the coding region of *ORF10* has no indels and is more conserved with the hypothetical protein compared with the upstream or downstream regions.

```

KM_244525 001 -----
XP1397039 001 MHPTGRKRRVITCVPCYTRKQRCNRQYPCNHCTRRRRPEECVYQSIITGDPSNTFLLEP-
XP1905776 001 MQSSQRKRVSVCIPCYTRKQRCNRQYPCNHCSRRRRPEQCAVNPSEQATLPPSPPTQKD

KM_244525 001 -----
XP1397039 060 -ARDPE-----PQEPNVQLPNGSSKASP--AEAQNSASNSHSALAKSFGYFEHSDSNT
XP1905776 061 HLHDEIQTDDSQEQAQAERRPASSSSVQDTINWGGLKEGREPTSLAEVFGYFENSKSNT

KM_244525 001 -----MPSTLINDVQCELKLLHARGIVDFLIQYFEDINWINQ
XP1397039 111 MALLKKWDLDEGDTDQSTQG-LSTAVLETVKQVLEKTPFRFILDFLMQYFVDEINWVKQ
XP1905776 121 IALVRKLGADDDATGHSSEPAFVPEETAIIAQRLFASMPNRSILDFLWRYEIAEVSWMQD

KM_244525 039 IVHPPRLLAQYEDWKKMDTISRVADEFAVLMRLICAYASHFLPSQKYTVDTIKGRPLSD
XP1397039 170 ITHPPSELTQYQHWTKKWPLSVDDIEFALVLRICAYSAQFLPSPTHLLDRIRGQSLSD
XP1905776 181 LIYPPWFLSHYQKWWEMERTSTAYGIEFAVLVLRICSYASQFLPSPTCTLDSIRGVLAD

KM_244525 099 IRSNCDRLAGLEGICNAAVLRGSLVRVCHMAFTAMCYECSRIKLSWATLCCAIREAQE
XP1397039 230 IRDTCSEHLGSLARRACLNLNWRGSLVRVCHLFAAFRSSCEGRDCKPWEHTASACSAAOK
XP1905776 241 IRKSCDRVADALTFICSRLDARGLSLRVCHVAFAGTRSLCQGRTNAHWEALSCAVRVAQR

KM_244525 159 VGLHREPPKRC-DDGMDDLERELRRRRCFNLR-----LAKALDRVPFLVDAYCTVSLPQM
XP1397039 290 AGHTVAVPVC-EDSSQVLEKEMRRRITCGLYVLDSELARQLDRVPFLFDNLVLETLPRRL
XP1905776 301 IGLEVDTATSGFYSPNMDELEKEMRRRRCFNLYVWDSVLSKRLDCRPFIPDALNPDTPRM

KM_244525 213 HLEETIANL----CAPDLFTErvLOAQLVRFWKKLEAGNSAPGAFPYDPVIAEERYQRFC
XP1397039 349 RLAEFTICDLAASADAPEFTErLMOVRLGRFWRSFGSRR----NIPYDPTGEGQRYERFC
XP1905776 361 HLVLGLDDV-PQADAPDLFTErvLEAQLANFWRTHGSGN----ATEYDPTAAEERYEKFC

KM_244525 269 NEFLPELPAFALEFN--TDWDKHIPDLERQRVLFHVALFESVMHNFROLRLDQHHLRS
XP1397039 405 AEYIPILPPAVALNPD--RRWDGQLPELPMORCLLYIAFFSVQGNFRFLLIKPGQVTS
XP1905776 416 SEFLPEIPVFALYEDTCDRWDARLPLELQRCQMFMAILESLCHNFRPALFQEPNSIQQ

KM_244525 327 LPNSRMLVTCHRHTLATAAMGLFQSVTSLHAMMSFNQTKLSLVIEYHFETAVVLSL-CI
XP1397039 463 LPPYKQVLLQSQKQLALAAEELDAVTPLHIMFGGSHTRFSAIISNTFERAVVLLILCT
XP1905776 476 LPAYKQILLSEKRALAVIAANILEGVSLHLMMGGSHTRHASLIIPTFERAVVLLCLCS

KM_244525 386 LQACDSNGMQII---EHINFFSLHSPLSPNMIDISCQCLRAIKRARRCLEMMSLISVMA
XP1397039 523 QKDFPFQGE-----DHPDILGLRVATLTPRRMRAVERALGRLCMIAEVSEMA
XP1905776 536 DGNFPKAEITLARGSTTSMTKSSDPEFGVWTDVAKDECIQAVRSALGRLOTADMNHMA

KM_244525 443 ETGAHQLGILVDHVQATLARSQTCTRSMPSTETLTYNSSSSTSYGNCHAHGVSSSELPFTF
XP1397039 572 ASCAQVVTQLFAKAARMEH----SLEPYTPNESRS-SSSPAILSN-----
XP1905776 596 EVGARTLTRLGKTEKISD----TTVSEA-NTLRL-EDPIVVD-----

KM_244525 503 QRQEGPTANAFRTDSNVFEGMLWDLSTIALPLDPSFLGLEQLBMSL--QRMVGL---
XP1397039 613 -----FLNLEDGSGLWMSSEIPLMPD-MSTIAHGQSYSLQFPSHILTSW
XP1905776 636 -----PALQ---LSEANCLQTPDYAEVFLMENT-----PTTMSVFSW

KM_244525 -----
XP1397039 659 NGNFHS
XP1905776 673 F-----

```

**FIG S5** Multiple amino acid sequence alignment of *A. rabiei* Sol4 (KM244525) and two hypothetical proteins from *Aspergillus niger* (XP\_001397039) and *Podospora anserina* (XP\_001905776). Alignment was shaded to indicate similarity with black corresponding to blocks of identical residues, and with grey corresponding to conservative substitutions. Zn(II)<sub>2</sub>Cys<sub>6</sub> (C<sub>6</sub>) zinc cluster DNA-binding domain is boxed in purple and middle homology region (MHR) is marked with blue line. The coiled coil region in Sol4 amino acid sequence detected by COILS program (1) is boxed in green (a region with prediction values greater than 0.8 in scanning windows of 14). No coiled coil region was predicted for the two hypothetical proteins. Note that Sol4 lacks the C<sub>6</sub> zinc cluster DNA-binding domain.

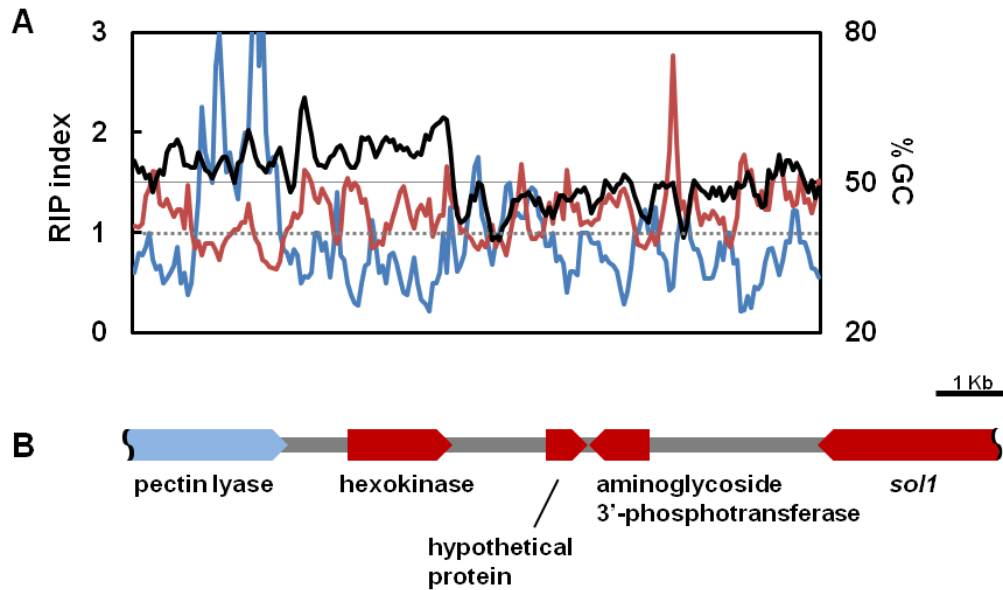

**FIG S6** Gene content of the flanking region of *sol1* gene in *Alternaria solani*. (A) GC content (%), black line), RIP index I (TpA/ApT, blue line) and RIP index II (CpA+TpG/ApC+ GpT, red line) were calculated in a 200-bp window, which was slid in 50-bp increments across  $\approx 10$  kb of the flanking sequence. Horizontal solid lines are provided to show the 50% GC mark, while dashed line shows a RIP index value of 1. (B) Schematic diagram of arrangement and orientation of three open reading frames (red boxes) and one pseudogene (blue box). Genes found were pectin lyase (similar to XM\_001796354, 67% identity,  $E$ -value =  $4e-155$ ), hexokinase (similar to XP\_008029266, 94% identity,  $E$ -value = 0), hypothetical protein (similar to XP\_007692661, 88% identity,  $E$ -value =  $1e-119$ ), and aminoglycoside 3'-phosphotransferase (similar to XP\_007692660, 85% identity,  $E$ -value = 0). Note that the partial coding region of pectin lyase gene showed strong RIP response.

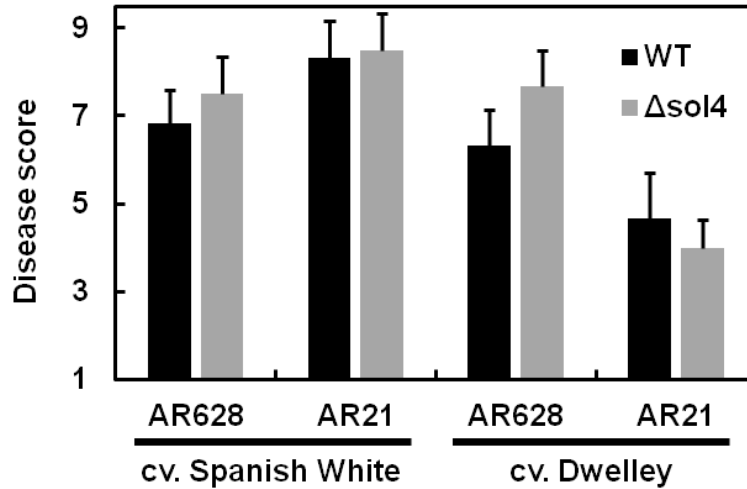

**FIG S7** Comparison of virulence between  $\Delta sol4$  mutants and their wild-type progenitors. Mean disease severity of two chickpea cultivars Spanish White and Dwelley caused by wild-type strains AR628 (pathotype II), AR21 (pathotype I), and their corresponding  $\Delta sol4$  mutants. Disease score was assessed 2 weeks after inoculation, based on the 1–9 rating scale (1 = no symptom, 9 = dead plants) as described previously (2). Student’s *t*-test showed that the disease severity caused by the  $\Delta sol4$  mutants was not different from that caused by their respective wild-type progenitors.

## REFERENCES

1. **Lupas A, Van Dyke M, Stock J.** 1991. Predicting coiled coils from protein sequences. *Science* **252**:1162-1164.
2. **Chen W, Coyne CJ, Peever TL, Muehlbauer FJ.** 2004. Characterization of chickpea differentials for pathogenicity assay of ascochyta blight and identification of chickpea accessions resistant to *Didymella rabiei*. *Plant Pathol.* **53**:759-769.
